# Supplementary material
Source: publisher figshare collection journal article supplement (https://tandf.figshare.com/ndownloader/files/22658114)
Supplement: Supplementary file 1 [file 22658114]

| **Appendix 1: Descriptive statistics by place of measurement at each hour of the day in the student kitchen and serving area** | | | | | | | | | | | | | | | | |
| --- | --- | --- | --- | --- | --- | --- | --- | --- | --- | --- | --- | --- | --- | --- | --- | --- |
|  | **Student Kitchen** | | | | | | | | **Student Serving Area** | | | | | | | |
|  | **Arithmetic mean (SD)** | **Geometric mean (SD)** | **Median (IQR)** | | | | **(Min, Max)** | | **Arithmetic mean (SD)** | | **Geometric mean (SD)** | **Median (IQR)** | | | | **(Min, Max)** |
| **00:00** | 3.6 (1.4) | 3.3 (1.6) | 3.5 | (3.0, 4.5) | | | (1.5, 8.0) | | 2.1 (0.9) | | 1.9 (1.5) | 1.5 | (1.5, 3.0) | | | (1.5, 4.0) |
| **01:00** | 2 (0.8) | 1.8 (1.4) | 1.5 | (1.5, 3.0) | | | (1.5, 5.0) | | 1.8 (0.6) | | 1.7 (1.3) | 1.5 | (1.5, 1.5) | | | (1.5, 3.5) |
| **02:00** | 1.7 (0.5) | 1.7 (1.3) | 1.5 | (1.5, 1.5) | | | (1.5, 3.5) | | 1.5 (0) | | 1.5 (1) | 1.5 | (1.5, 1.5) | | | (1.5, 1.5) |
| **03:00** | 1.8 (0.6) | 1.7 (1.3) | 1.5 | (1.5, 1.5) | | | (1.5, 3.5) | | 1.5 (0) | | 1.5 (1) | 1.5 | (1.5, 1.5) | | | (1.5, 1.5) |
| **04:00** | 1.5 (0) | 1.5 (1) | 1.5 | (1.5, 1.5) | | | (1.5, 1.5) | | 1.5 (0) | | 1.5 (1) | 1.5 | (1.5, 1.5) | | | (1.5, 1.5) |
| **05:00** | 1.5 (0) | 1.5 (1) | 1.5 | (1.5, 1.5) | | | (1.5, 1.5) | | 1.5 (0) | | 1.5 (1) | 1.5 | (1.5, 1.5) | | | (1.5, 1.5) |
| **06:00** | 9.4 (6.1) | 7 (2.3) | 9.0 | (4.8, 13.0) | | | (1.5, 28.5) | | 3.4 (2.6) | | 2.6 (2) | 1.5 | (1.5, 3.5) | | | (1.5, 11.0) |
| **07:00** | 6.9 (3.2) | 6.1 (1.7) | 6.0 | (5.0, 8.5) | | | (1.5, 19.5) | | 4.4 (1.4) | | 4.1 (1.4) | 4.0 | (3.0, 5.5) | | | (1.5, 7.5) |
| **08:00** | 9.6 (6.5) | 8.1 (1.7) | 8.0 | (5.0, 11.0) | | | (3.5, 40.5) | | 3.4 (0.8) | | 3.3 (1.3) | 3.5 | (3.0, 4.0) | | | (1.5, 5.5) |
| **09:00** | 24.2 (8.9) | 22.7 (1.4) | 22.8 | (18.0, 29.0) | | | (9.0, 53.5) | | 5.9 (2.6) | | 5.4 (1.5) | 5.5 | (4.0, 7.0) | | | (3.0, 17.0) |
| **10:00** | 85.8 (39.8) | 76.1 (1.7) | 76.3 | (57.8, 109.0) | | | (19.0, 205.0) | | 6.4 (2.5) | | 6 (1.5) | 6.3 | (4.0, 8.0) | | | (3.0, 14.0) |
| **11:00** | 86.2 (44.7) | 78.2 (1.5) | 71.0 | (58.0, 92.3) | | | (42.5, 255.5) | | 4.9 (1.6) | | 4.6 (1.3) | 4.3 | (3.5, 5.8) | | | (3.0, 10.0) |
| **12:00** | 69.7 (22) | 66.3 (1.4) | 67.5 | (53.3, 83.3) | | | (26.0, 142.0) | | 4.5 (1.2) | | 4.4 (1.3) | 4.5 | (3.5, 5.0) | | | (1.5, 8.0) |
| **13:00** | 34.2 (14.9) | 31.7 (1.5) | 31.5 | (23.5, 39.5) | | | (14.5, 97.0) | | 3 (1.2) | | 2.7 (1.6) | 3.0 | (1.5, 3.5) | | | (1.5, 6.0) |
| **14:00** | 18.5 (5.9) | 17.5 (1.4) | 18.5 | (14.0, 23.0) | | | (8.5, 34.0) | | 3.5 (1.5) | | 3.1 (1.6) | 3.5 | (1.5, 4.5) | | | (1.5, 7.0) |
| **15:00** | 12.2 (3.5) | 11.8 (1.3) | 11.5 | (10.0, 14.0) | | | (6.0, 23.0) | | 2 (0.9) | | 1.8 (1.4) | 1.5 | (1.5, 3.0) | | | (1.5, 5.0) |
| **16:00** | 28.9 (29.6) | 16.3 (3) | 11.8 | (6.0, 50.8) | | | (3.0, 140.5) | | 1.5 (0.2) | | 1.5 (1.1) | 1.5 | (1.5, 1.5) | | | (1.5, 3.5) |
| **17:00** | 66.3 (41.4) | 51.1 (2.3) | 59.0 | (34.3, 96.5) | | | (3.5, 178.5) | | 2.9 (2.8) | | 2.2 (1.9) | 1.5 | (1.5, 3.0) | | | (1.5, 11.5) |
| **18:00** | 64.1 (27.3) | 58.4 (1.6) | 61.3 | (42.0, 77.8) | | | (22.0, 136.0) | | 8.9 (7.4) | | 5.7 (2.8) | 6.8 | (1.5, 16.0) | | | (1.5, 26.0) |
| **19:00** | 56.2 (32.6) | 48 (1.8) | 50.8 | (31.3, 68.3) | | | (15.0, 170.0) | | 18.1 (9.1) | | 16.3 (1.6) | 14.5 | (11.0, 20.0) | | | (9.0, 41.5) |
| **20:00** | 36.7 (11.5) | 34.9 (1.4) | 34.3 | (27.5, 46.3) | | | (18.0, 69.0) | | 14.4 (10.8) | | 11.1 (2) | 9.5 | (5.5, 22.0) | | | (4.5, 37.5) |
| **21:00** | 20.4 (10.3) | 18.3 (1.6) | 17.8 | (12.5, 25.3) | | | (7.5, 59.5) | | 4.8 (2) | | 4.4 (1.5) | 4.0 | (3.5, 5.3) | | | (1.5, 9.5) |
| **22:00** | 10.9 (4.3) | 10.2 (1.4) | 10.5 | (8.0, 12.5) | | | (4.0, 30.5) | | 2.4 (1) | | 2.2 (1.5) | 1.5 | (1.5, 3.0) | | | (1.5, 4.5) |
| **23:00** | 5.3 (3) | 4.4 (1.9) | 4.8 | (3.0, 7.5) | | | (1.5, 15.5) | | 1.8 (0.6) | | 1.7 (1.3) | 1.5 | (1.5, 1.5) | | | (1.5, 3.0) |
| Median = Median CO (ppm) concentration within the hour | | | | | | | | | | | | | | | |  |
| IQR = Interquartile range of CO (ppm) concentration | | | | | | | | | | | | | | | | |
| Min, Max = the minimum and Maximum CO (ppm) concentrations within the hour | | | | | | | | | | | | | | | | |
| Any observation below the LOD (3ppm) has been assigned a value of 1.5 ppm | | | | | | | | | | | | | | | | |
| **Appendix 2: Descriptive statistics by place of measurement at each hour of the day in the staff kitchen and serving area** | | | | | | | | | | | | | | | | |
|  | **Staff Kitchen** | | | | | | | **Staff Serving Area** | | | | | | | | |
|  | **Arithmetic mean (SD)** | **Geometric mean (SD)** | **Median (IQR)** | | | **(Min, Max)** | | **Arithmetic mean (SD)** | | **Geometric mean (SD)** | | **Median (IQR)** | | | **(Min, Max)** | |
| **00:00** | 1.5 (0) | 1.5 (1) | 1.5 | | (1.5, 1.5) | (1.5, 1.5) | | 1.5 (0) | | 1.5 (1) | | 1.5 | | (1.5, 1.5) | (1.5, 1.5) | |
| **01:00** | 1.5 (0) | 1.5 (1) | 1.5 | | (1.5, 1.5) | (1.5, 1.5) | | 1.5 (0) | | 1.5 (1) | | 1.5 | | (1.5, 1.5) | (1.5, 1.5) | |
| **02:00** | 1.5 (0) | 1.5 (1) | 1.5 | | (1.5, 1.5) | (1.5, 1.5) | | 1.5 (0) | | 1.5 (1) | | 1.5 | | (1.5, 1.5) | (1.5, 1.5) | |
| **03:00** | 1.5 (0) | 1.5 (1) | 1.5 | | (1.5, 1.5) | (1.5, 1.5) | | 1.5 (0) | | 1.5 (1) | | 1.5 | | (1.5, 1.5) | (1.5, 1.5) | |
| **04:00** | 1.5 (0) | 1.5 (1) | 1.5 | | (1.5, 1.5) | (1.5, 1.5) | | 1.5 (0) | | 1.5 (1) | | 1.5 | | (1.5, 1.5) | (1.5, 1.5) | |
| **05:00** | 1.5 (0) | 1.5 (1) | 1.5 | | (1.5, 1.5) | (1.5, 1.5) | | 1.5 (0) | | 1.5 (1) | | 1.5 | | (1.5, 1.5) | (1.5, 1.5) | |
| **06:00** | 1.5 (0) | 1.5 (1) | 1.5 | | (1.5, 1.5) | (1.5, 1.5) | | 1.5 (0) | | 1.5 (1) | | 1.5 | | (1.5, 1.5) | (1.5, 1.5) | |
| **07:00** | 3.5 (5) | 2.2 (2.2) | 1.5 | | (1.5, 1.5) | (1.5, 29.5) | | 1.5 (0) | | 1.5 (1) | | 1.5 | | (1.5, 1.5) | (1.5, 1.5) | |
| **08:00** | 47.5 (30.1) | 34.3 (2.7) | 44.5 | | (22.0, 70.5) | (1.5, 130.0) | | 1.7 (1.3) | | 1.6 (1.3) | | 1.5 | | (1.5, 1.5) | (1.5, 13.5) | |
| **09:00** | 83.2 (42.1) | 72.3 (1.7) | 76.3 | | (52.5, 114.0) | (15.5, 208.5) | | 2.4 (2.5) | | 1.9 (1.7) | | 1.5 | | (1.5, 1.5) | (1.5, 15.0) | |
| **10:00** | 54.6 (31.8) | 45.6 (1.9) | 48.5 | | (31.0, 69.8) | (4.5, 153.5) | | 1.7 (1) | | 1.6 (1.3) | | 1.5 | | (1.5, 1.5) | (1.5, 10.0) | |
| **11:00** | 42.5 (26.1) | 34.5 (2) | 38.0 | | (23.0, 58.3) | (4.0, 154.0) | | 1.7 (1) | | 1.6 (1.3) | | 1.5 | | (1.5, 1.5) | (1.5, 9.0) | |
| **12:00** | 23.8 (11.7) | 20.8 (1.7) | 24.0 | | (15.3, 29.8) | (3.0, 67.5) | | 1.8 (1.4) | | 1.7 (1.4) | | 1.5 | | (1.5, 1.5) | (1.5, 10.5) | |
| **13:00** | 20.6 (19.3) | 11.3 (3.4) | 15.3 | | (4.0, 33.3) | (1.5, 75.5) | | 1.5 (0.2) | | 1.5 (1.1) | | 1.5 | | (1.5, 1.5) | (1.5, 3.5) | |
| **14:00** | 12.7 (13) | 6.8 (3.3) | 7.5 | | (1.5, 20.0) | (1.5, 73.0) | | 1.5 (0.4) | | 1.5 (1.1) | | 1.5 | | (1.5, 1.5) | (1.5, 5.5) | |
| **15:00** | 8.9 (7) | 6.3 (2.5) | 6.5 | | (3.5, 13.3) | (1.5, 30.0) | | 1.5 (0) | | 1.5 (1) | | 1.5 | | (1.5, 1.5) | (1.5, 1.5) | |
| **16:00** | 5.8 (6.4) | 3.6 (2.6) | 3.3 | | (1.5, 8.3) | (1.5, 43.0) | | 1.5 (0) | | 1.5 (1) | | 1.5 | | (1.5, 1.5) | (1.5, 1.5) | |
| **17:00** | 3.9 (4.2) | 2.6 (2.2) | 1.5 | | (1.5, 4.8) | (1.5, 23.5) | | 1.5 (0) | | 1.5 (1) | | 1.5 | | (1.5, 1.5) | (1.5, 1.5) | |
| **18:00** | 19.4 (18.6) | 9.9 (3.8) | 15.3 | | (1.5, 30.0) | (1.5, 74.5) | | 1.5 (0) | | 1.5 (1) | | 1.5 | | (1.5, 1.5) | (1.5, 1.5) | |
| **19:00** | 15.2 (9.7) | 11.5 (2.4) | 14.5 | | (9.3, 19.8) | (1.5, 61.0) | | 1.6 (0.6) | | 1.5 (1.2) | | 1.5 | | (1.5, 1.5) | (1.5, 8.0) | |
| **20:00** | 5.8 (5.5) | 3.9 (2.4) | 4.0 | | (1.5, 9.0) | (1.5, 37.0) | | 1.5 (0.1) | | 1.5 (1.1) | | 1.5 | | (1.5, 1.5) | (1.5, 3.0) | |
| **21:00** | 1.7 (0.8) | 1.6 (1.3) | 1.5 | | (1.5, 1.5) | (1.5, 7.0) | | 1.5 (0) | | 1.5 (1) | | 1.5 | | (1.5, 1.5) | (1.5, 1.5) | |
| **22:00** | 1.6 (0.4) | 1.6 (1.2) | 1.5 | | (1.5, 1.5) | (1.5, 3.5) | | 1.5 (0) | | 1.5 (1) | | 1.5 | | (1.5, 1.5) | (1.5, 1.5) | |
| **23:00** | 1.5 (0) | 1.5 (1) | 1.5 | | (1.5, 1.5) | (1.5, 1.5) | | 1.5 (0) | | 1.5 (1) | | 1.5 | | (1.5, 1.5) | (1.5, 1.5) | |
| Median = Median CO (ppm) concentration within the hour | | | | | | | | | | | | | | |  | |
| IQR = Interquartile range of CO (ppm) concentration | | | | | | | | | | | | | | | | |
| Min, Max = the minimum and Maximum CO (ppm) concentrations within the hour | | | | | | | | | | | | | | | | |
| Any observation below the LOD (3ppm) has been assigned a value of 1.5 ppm | | | | | | | | | | | | | | | | |
